# Supplementary material for: Down-regulation of ACACA suppresses the malignant progression of Prostate Cancer through inhibiting mitochondrial potential
Source: PubMed Central journal article supplement (PMC7738814; doi:10.7150/jca.49560), 2021-01-01
Supplement: jcav12p0232s1.pdf [file jcav12p0232s1.pdf]

## Supplementary materials

### (1) 31 tumor abbreviations

1. ACC Adrenocortical carcinoma
2. BLCA Bladder Urothelial Carcinoma
3. BRCA Breast invasive carcinoma
4. CESC Cervical squamous cell carcinoma and endocervical adenocarcinoma
5. CHOL Cholangiocarcinoma
6. COAD Colon adenocarcinoma
7. DLBC Lymphoid Neoplasm Diffuse Large B-cell Lymphoma
8. ESCA Esophageal carcinoma
9. GBM Glioblastoma multiforme
10. HNSC Head and Neck squamous cell carcinoma
11. KICH Kidney Chromophobe
12. KIRC Kidney renal clear cell carcinoma
13. KIRP Kidney renal papillary cell carcinoma
14. LAML Acute Myeloid Leukemia
15. LGG Brain Lower Grade Glioma
16. LIHC Liver hepatocellular carcinoma
17. LUAD Lung adenocarcinoma
18. LUSC Lung squamous cell carcinoma
19. OV Ovarian serous cystadenocarcinoma
20. PAAD Pancreatic adenocarcinoma
21. PCPG Pheochromocytoma and Paraganglioma
22. PRAD Prostate adenocarcinoma
23. READ Rectum adenocarcinoma
24. SARC Sarcoma
25. SKCM Skin Cutaneous Melanoma
26. STAD Stomach adenocarcinoma
27. TGCT Testicular Germ Cell Tumors
28. THCA Thyroid carcinoma
29. THYM Thymoma
30. UCEC Uterine Corpus Endometrial Carcinoma
31. UCS Uterine Carcinosarcoma

(2) Supplementary Figure 1

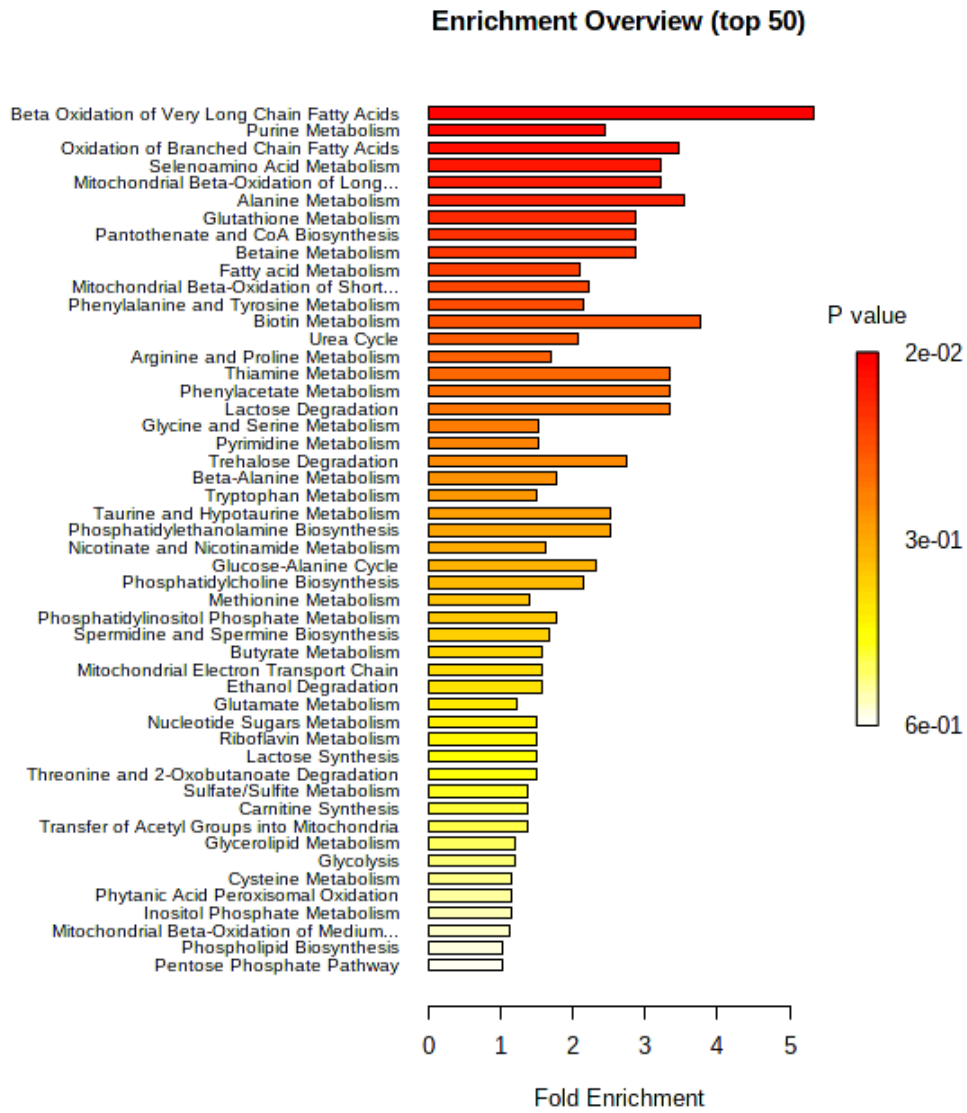

Summary Plot for metabolites analysis in DU145-SH and PC3-SH cell lines. Thirty-nine metabolites compounds which were both have changed including up-regulated and down-regulated in DU145-SH and PC3-SH cell lines were input for the Metabolite Set Enrichment Analysis.

(3) Supplementary Figure 2

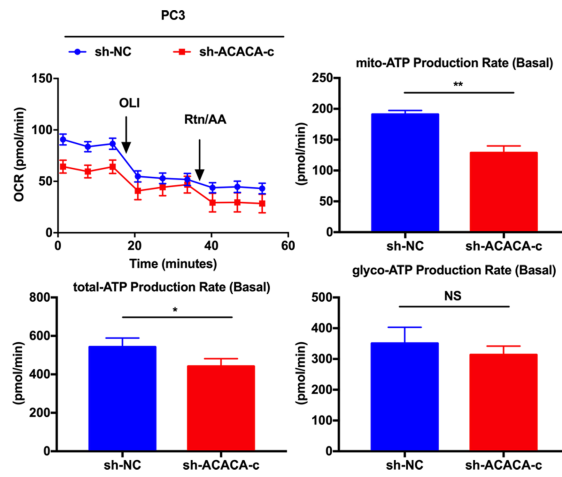

OCR in the PC3 cells was analyzed by the seahorse XF Real-Time-ATP-Rate kit. ATP production was analyzed in the bar graph.

### (4) Supplementary Table 1

| Position | No. | Age | Sex | Organ/Anator | Pathology diagnosis      | n      | m      | group  | Intensity | area | SCORE | TNM    | Grade | Stage | Stage | Type      | Tissue ID |
|----------|-----|-----|-----|--------------|--------------------------|--------|--------|--------|-----------|------|-------|--------|-------|-------|-------|-----------|-----------|
| A1       | 1   | 71  | M   | Prostate     | Adenocarcinoma           | 0      | 0      | 0      | 4         | 0    | 0     | T2NM0  | 2     | II    |       | Malignant | Mpr00049  |
| A2       | 2   | 66  | M   | Prostate     | Adenocarcinoma           | 1      | 1      | 1      | 4         | 2    | 8     | T3N1M1 | 1     | IV    | 4     | Malignant | Mpr00049  |
| A3       | 3   | 60  | M   | Prostate     | Adenocarcinoma           | 0      | 0      | 0      | 4         | 0    | 0     | T2NM0  | 3     | III   | 3     | Malignant | Mpr00010  |
| A4       | 4   | 76  | M   | Prostate     | Adenocarcinoma           | 0      | 0      | 0      | 4         | 0    | 0     | T2NM0  | 1     | II    | 2     | Malignant | Mpr00277  |
| A5       | 5   | 73  | M   | Prostate     | Adenocarcinoma           | 0      | 0      | 0      | 4         | 2    | 8     | T2NM0  | 2     | IIA   | 2     | Malignant | Mpr10014  |
| A6       | 6   | 26  | M   | Prostate     | Adenocarcinoma           | 0      | 0      | 0      | 4         | 0    | 0     | T2NM0  | -     | II    | 2     | Malignant | Mpr00006  |
| A7       | 7   | 72  | M   | Prostate     | Adenocarcinoma           | 0      | 0      | 0      | 4         | 1    | 4     | T2NM0  | 1     | I     | 1     | Malignant | Mpr04048  |
| A8       | 8   | 76  | M   | Prostate     | Adenocarcinoma           | 0      | 0      | 0      | 4         | 1    | 4     | T2NM0  | 2     | II    | 2     | Malignant | Mpr00106  |
| A9       | 9   | 71  | M   | Prostate     | Adenocarcinoma           | 0      | 0      | 0      | 4         | 1    | 4     | T2NM0  | 1     | II    | 2     | Malignant | Mpr07077  |
| A10      | 10  | 71  | M   | Prostate     | Adenocarcinoma           | 0      | 0      | 0      | 4         | 1    | 4     | T2NM0  | 2     | II    | 2     | Malignant | Mpr00033  |
| B1       | 11  | 71  | M   | Prostate     | Adenocarcinoma           | 0      | 0      | 0      | 0         | 0    | 0     | T1NM0  | 2     | I     | 1     | Malignant | Mpr00063  |
| B2       | 12  | 66  | M   | Prostate     | Adenocarcinoma           | 0      | 0      | 0      | 4         | 1    | 4     | T2NM0  | 2     | II    | 2     | Malignant | Mpr00031  |
| B3       | 13  | 75  | M   | Prostate     | Adenocarcinoma           | 1      | 1      | 1      | 4         | 1    | 4     | T3N1M1 | 1     | IV    | 4     | Malignant | Mpr00042  |
| B4       | 14  | 60  | M   | Prostate     | Adenocarcinoma           | 0      | 0      | 0      | 4         | 1    | 4     | T2NM0  | 2     | II    | 2     | Malignant | Mpr02011  |
| B5       | 15  | 67  | M   | Prostate     | Adenocarcinoma           | 0      | 1      | 0      | 4         | 2    | 8     | T2NM1  | 2     | IV    | 4     | Malignant | Mpr00020  |
| B6       | 16  | 60  | M   | Prostate     | Adenocarcinoma           | 1      | 0      | 1      | 4         | 1    | 4     | T3NM0  | 2     | IV    | 4     | Malignant | Mpr00011  |
| B7       | 17  | 71  | M   | Prostate     | Adenocarcinoma           | 0      | 0      | 0      | 0         | 0    | 0     | T2NM0  | 2     | IIA   | 2     | Malignant | Mpr10007  |
| B8       | 18  | 75  | M   | Prostate     | Adenocarcinoma           | 1      | 1      | 1      | 4         | 3    | 12    | T4N1M1 | 2     | IV    | 4     | Malignant | Mpr03007  |
| B9       | 19  | 71  | M   | Prostate     | Adenocarcinoma           | 0      | 0      | 0      | 4         | 1    | 4     | T2NM0  | -     | I     | 1     | Malignant | Mpr10042  |
| B10      | 20  | 66  | M   | Prostate     | Adenocarcinoma           | 0      | 0      | 0      | 4         | 0    | 0     | T2NM0  | 2     | IIA   | 2     | Malignant | Mpr10012  |
| C1       | 21  | 64  | M   | Prostate     | Adenocarcinoma           | 0      | 0      | 0      | 4         | 2    | 8     | T2NM1  | 2     | IV    | 4     | Malignant | Mpr00059  |
| C2       | 22  | 71  | M   | Prostate     | Adenocarcinoma           | 0      | 0      | 0      | 4         | 1    | 4     | T2NM0  | 2     | II    | 2     | Malignant | Mpr00123  |
| C3       | 23  | 64  | M   | Prostate     | Adenocarcinoma           | 0      | 0      | 0      | 4         | 1    | 4     | T2NM0  | 3     | II    | 2     | Malignant | Mpr10054  |
| C4       | 24  | 73  | M   | Prostate     | Adenocarcinoma           | 0      | 0      | 0      | 4         | 1    | 4     | T2NM0  | 3     | II    | 2     | Malignant | Mpr00053  |
| C5       | 25  | 56  | M   | Prostate     | Adenocarcinoma           | 0      | 0      | 0      | 0         | 0    | 0     | T2NM0  | 2     | II    | 2     | Malignant | Mpr04026  |
| C7       | 27  | 70  | M   | Prostate     | Adenocarcinoma           | 1      | 1      | 0      | 4         | 1    | 4     | T3N1M1 | 2     | IV    | 4     | Malignant | Mpr00345  |
| C8       | 28  | 82  | M   | Prostate     | Adenocarcinoma           | 1      | 0      | 1      | 4         | 3    | 12    | T3N1M1 | 3     | IV    | 4     | Malignant | Mpr10019  |
| C9       | 29  | 64  | M   | Prostate     | Adenocarcinoma           | 0      | 0      | 0      | 0         | 0    | 0     | T2NM0  | 3     | IB    | 1     | Malignant | Mpr07166  |
| C10      | 30  | 61  | M   | Prostate     | Adenocarcinoma           | 0      | 0      | 0      | 4         | 1    | 4     | T2NM0  | 2-3   | II    | 2     | Malignant | Mpr07019  |
| D1       | 31  | 69  | M   | Prostate     | Adenocarcinoma           | 0      | 0      | 1      | 4         | 3    | 12    | T2NM0  | 2-3   | III   | 3     | Malignant | Mpr00166  |
| D2       | 32  | 73  | M   | Prostate     | Adenocarcinoma           | 1      | 1      | 1      | 4         | 2    | 8     | T3N1M1 | 3     | IV    | 4     | Malignant | Mpr00374  |
| D3       | 33  | 60  | M   | Prostate     | Adenocarcinoma           | 0      | 0      | 0      | 4         | 1    | 4     | T2NM0  | 3     | II    | 2     | Malignant | Mpr00024  |
| D4       | 34  | 74  | M   | Prostate     | Adenocarcinoma           | 0      | 0      | 0      | 4         | 1    | 4     | T2NM0  | -     | IIA   | 2     | Malignant | Mpr10029  |
| D5       | 35  | 20  | M   | Prostate     | Adenocarcinoma           | 0      | 0      | 1      | 4         | 2    | 8     | T3NM0  | 3     | III   | 3     | Malignant | Mpr06071  |
| D6       | 36  | 70  | M   | Prostate     | Adenocarcinoma           | 0      | 0      | 0      | 0         | 0    | 0     | T2NM0  | 3     | -     | -     | Malignant | Mpr06100  |
| D7       | 37  | 73  | M   | Prostate     | Adenocarcinoma           | 0      | 0      | 0      | 4         | 1    | 4     | T2NM0  | 3     | II    | 2     | Malignant | Mpr00122  |
| D8       | 38  | 73  | M   | Prostate     | Adenocarcinoma           | 1      | 0      | 1      | 4         | 1    | 4     | T2NM0  | 3     | IV    | 4     | Malignant | Mpr00433  |
| D9       | 39  | 72  | M   | Prostate     | Adenocarcinoma           | 0      | 0      | 1      | 4         | 1    | 4     | T2NM0  | 3     | III   | 3     | Malignant | Mpr00093  |
| D10      | 40  | 64  | M   | Prostate     | Adenocarcinoma           | 0      | 0      | 1      | 4         | 2    | 8     | T2NM0  | -     | 2-3   | 3     | Malignant | Mpr00003  |
| E1       | 41  | 74  | M   | Prostate     | Adenocarcinoma           | 0      | 0      | 0      | 4         | 1    | 4     | T2NM0  | 3     | II    | 2     | Malignant | Mpr04041  |
| E2       | 42  | 62  | M   | Prostate     | Adenocarcinoma           | 0      | 0      | 0      | 4         | 1    | 4     | T2NM0  | 3     | II    | 2     | Malignant | Mpr00147  |
| E3       | 43  | 68  | M   | Prostate     | Adenocarcinoma           | 0      | 0      | 0      | 4         | 0    | 0     | T2NM0  | 3     | II    | 2     | Malignant | Mpr10039  |
| E4       | 44  | 66  | M   | Prostate     | Adenocarcinoma           | 0      | 0      | 1      | 4         | 1    | 4     | T3NM0  | 3     | III   | 3     | Malignant | Mpr06047  |
| E5       | 45  | 67  | M   | Prostate     | Adenocarcinoma           | 0      | 0      | 0      | 4         | 1    | 4     | T2NM0  | 3     | II    | 2     | Malignant | Mpr10032  |
| E6       | 46  | 82  | M   | Prostate     | Adenocarcinoma           | 1      | 0      | 1      | 3         | 3    | 9     | T3NM0  | 3     | IV    | 4     | Malignant | Mpr10019  |
| E7       | 47  | 64  | M   | Prostate     | Adenocarcinoma           | 0      | 0      | 0      | 4         | 1    | 4     | T2NM0  | 3     | II    | 2     | Malignant | Mpr10033  |
| E8       | 48  | 76  | M   | Prostate     | Adenocarcinoma           | 0      | 0      | 1      | 4         | 0    | 0     | T2NM0  | 3     | III   | 3     | Malignant | Mpr02087  |
| E9       | 49  | 75  | M   | Prostate     | Adenocarcinoma           | 1      | 1      | 1      | 4         | 2    | 8     | T4N1M1 | 3     | IV    | 4     | Malignant | Mpr00029  |
| E10      | 50  | 75  | M   | Prostate     | Adenocarcinoma           | 0      | 0      | 0      | 4         | 1    | 4     | T2NM0  | 2     | IIA   | 2     | Malignant | Mpr04053  |
| F1       | 51  | 62  | M   | Prostate     | Adenocarcinoma           | 0      | 0      | 1      | 4         | 1    | 4     | T2NM0  | 3     | III   | 3     | Malignant | Mpr04059  |
| F2       | 52  | 70  | M   | Prostate     | Adenocarcinoma           | 0      | 0      | 0      | 4         | 1    | 4     | T2NM0  | -     | II    | 2     | Malignant | Mpr02038  |
| F3       | 53  | 70  | M   | Prostate     | Adenocarcinoma           | 0      | 0      | 0      | 4         | 1    | 4     | T2NM0  | 3     | IB    | 2     | Malignant | Mpr00166  |
| F4       | 54  | 64  | M   | Prostate     | Adenocarcinoma           | 0      | 0      | 0      | 4         | 0    | 0     | T2NM0  | 3     | II    | 2     | Malignant | Mpr04071  |
| F5       | 55  | 62  | M   | Prostate     | Adenocarcinoma           | 0      | 0      | 0      | 4         | 0    | 0     | T2NM0  | 3     | II    | 2     | Malignant | Mpr040163 |
| F6       | 56  | 77  | M   | Prostate     | Adenocarcinoma           | 0      | 0      | 0      | 4         | 0    | 0     | T2NM0  | 3     | II    | 2     | Malignant | Mpr04016  |
| F7       | 57  | 60  | M   | Prostate     | Adenocarcinoma           | 1      | 0      | 1      | 4         | 2    | 8     | T3NM0  | 3     | IV    | 4     | Malignant | Mpr03026  |
| F8       | 58  | 56  | M   | Prostate     | Adenocarcinoma           | 0      | 0      | 1      | 0         | 0    | 0     | T2NM0  | 3     | III   | 3     | Malignant | Mpr10006  |
| F10      | 60  | 67  | M   | Prostate     | Adenocarcinoma           | 0      | 0      | 0      | 4         | 1    | 4     | T2NM0  | 3     | II    | 2     | Malignant | Mpr040165 |
| G1       | 61  | 67  | M   | Prostate     | Adenocarcinoma           | 0      | 0      | 0      | 4         | 1    | 4     | T2NM0  | 3     | II    | 2     | Malignant | Mpr00042  |
| G2       | 62  | 81  | M   | Prostate     | Adenocarcinoma           | 0      | 0      | 1      | 4         | 1    | 4     | T2NM0  | 3     | III   | 3     | Malignant | Mpr020317 |
| G3       | 63  | 73  | M   | Prostate     | Adenocarcinoma           | 0      | 0      | 0      | 4         | 1    | 4     | T2NM0  | 3     | IIA   | 2     | Malignant | Mpr10034  |
| G4       | 64  | 69  | M   | Prostate     | Adenocarcinoma           | 0      | 0      | 0      | 4         | 0    | 0     | T2NM0  | 3     | II    | 2     | Malignant | Mpr03032  |
| G5       | 65  | 62  | M   | Prostate     | Adenocarcinoma           | 0      | 0      | 0      | 4         | 0    | 0     | T2NM0  | 3     | II    | 2     | Malignant | Mpr00083  |
| G6       | 66  | 64  | M   | Prostate     | Adenocarcinoma           | 0      | 0      | 0      | 0         | 0    | 0     | T2NM0  | 3     | II    | 2     | Malignant | Mpr06077  |
| G7       | 67  | 82  | M   | Prostate     | Adenocarcinoma           | 0      | 0      | 1      | 4         | 1    | 4     | T2NM0  | 3     | III   | 3     | Malignant | Mpr04075  |
| G8       | 68  | 80  | M   | Prostate     | Adenocarcinoma           | 1      | 1      | 1      | 4         | 2    | 8     | T4N1M1 | 3     | IV    | 4     | Malignant | Mpr00382  |
| G9       | 69  | 63  | M   | Prostate     | Adenocarcinoma           | 0      | 0      | 0      | 4         | 1    | 4     | T2NM0  | 3     | II    | 2     | Malignant | Mpr03047  |
| G10      | 70  | 73  | M   | Prostate     | Adenocarcinoma           | 0      | 0      | 1      | 4         | 2    | 8     | T4NM0  | 3     | IV    | 4     | Malignant | Mpr00166  |
| H1       | 71  | 60  | M   | Prostate     | Adenocarcinoma           | 0      | 0      | 0      | 4         | 1    | 4     | T2NM0  | 3     | II    | 2     | Malignant | Mpr020323 |
| H4       | 74  | 27  | M   | Prostate     | Adjacent normal prostate | NAT    | NAT    | NAT    |           |      | 0     | -      | -     | -     | -     | NAT       | Mpr04012  |
| H5       | 75  | 35  | M   | Prostate     | Adjacent normal prostate | NAT    | NAT    | NAT    |           |      | 0     | -      | -     | -     | -     | NAT       | Mpr07058  |
| H6       | 76  | 21  | M   | Prostate     | Adjacent normal prostate | NAT    | NAT    | NAT    |           |      | 0     | -      | -     | -     | -     | NAT       | Mpr04014  |
| H7       | 77  | 45  | M   | Prostate     | Prostate tissue          | Normal | Normal | Normal |           |      | 0     | -      | -     | -     | -     | Normal    | Mpr07030  |
| H8       | 78  | 37  | M   | Prostate     | Prostate tissue          | Normal | Normal | Normal |           |      | 0     | -      | -     | -     | -     | Normal    | Mpr07028  |
| H9       | 79  | 33  | M   | Prostate     | Prostate tissue          | Normal | Normal | Normal |           |      | 0     | -      | -     | -     | -     | Normal    | Mpr07028  |
| H10      | 80  | 43  | M   | Prostate     | Prostate tissue          | Normal | Normal | Normal |           |      | 0     | -      | -     | -     | -     | Normal    | Mpr09019  |

(5) Supplementary Table 2

| DU145- ID | MS2 name                                               | MS2 score     | type               | mz                 | rt             | MEAN NC            | MEAN SH            | VIP                | P-VALUE            | Q-VALUE            | FOLD CHANGE        | LOG_FOLDCHANGE     |
|-----------|--------------------------------------------------------|---------------|--------------------|--------------------|----------------|--------------------|--------------------|--------------------|--------------------|--------------------|--------------------|--------------------|
| 5241      | 1-Myristoyl-sn-glycero-3-phosphocholine                | 0.9491        | MS2 forward        | 468.300783         | 181.641        | 0.08868236         | 0.113517602        | 1.54210749         | 1.14089E-06        | 4.67872E-06        | 1.645840347        | 0.71891205         |
| 296       | Creatinine                                             | 0.9972        | MS2 forward        | 114.066953         | 160.505        | 0.025430593        | 0.045546402        | 1.432148478        | 4.11946E-05        | 6.46202E-05        | 1.723245581        | 0.785128316        |
| 516       | Methyl acetacetate                                     | 0.9958        | MS2 reverse        | 134.0817286        | 329.328        | 0.01158646         | 0.018453727        | 1.45324927         | 1.92524E-05        | 3.57749E-05        | 1.592897637        | 0.671472407        |
| 880       | L-Carnitine                                            | 0.9481        | MS2 forward        | 162.1135707        | 357.413        | 0.252475197        | 0.36006097         | 1.215944268        | 0.004808181        | 0.003110716        | 1.428124132        | 0.512095661        |
| 1946      | Lys-Val                                                | 0.9925        | MS2 reverse        | 246.1821592        | 525.181        | 0.016809016        | 0.024942622        | 1.320800658        | 0.000681673        | 0.000634276        | 1.483883473        | 0.56837804         |
| 315       | L-Proline                                              | 0.9959        | MS2 forward        | 116.0716176        | 294.863        | 0.351689836        | 0.718613607        | 1.532948235        | 3.32498E-06        | 1.01032E-05        | 2.043032052        | 1.030711838        |
| 5906      | 1-O-Octadecyl-sn-glycero-3-phosphocholine              | 0.9851        | MS2 forward        | 510.3009364        | 177.954        | 0.040523963        | 0.029504673        | 1.046237882        | 0.021178904        | 0.010144726        | 0.728079124        | -0.45783285        |
| 428       | Taurine                                                | 0.9964        | MS2 forward        | 128.0225643        | 277.711        | 0.18688882         | 0.413370794        | 1.51582918         | 2.32426E-06        | 7.75886E-06        | 2.216201812        | 1.14608262         |
| 287       | Uracil                                                 | 0.9464        | MS2 forward        | 113.035166         | 89.4825        | 0.016498488        | 0.021035203        | 1.090009936        | 0.028845176        | 0.012363597        | 1.27497647         | 0.350471954        |
| 3002      | Tyr-Met                                                | 0.9703        | MS2 forward        | 312.1118534        | 163.65         | 0.030122583        | 0.022748909        | 1.453447627        | 0.000680762        | 0.000633655        | 0.755144709        | -0.405174558       |
| 5423      | 1-Stearoyl-2-hydroxy-sn-glycero-3-phosphoethanolamine  | 0.6549        | MS2 forward        | 482.3274229        | 179.784        | 0.101271127        | 0.153188719        | 1.482783748        | 8.2559E-06         | 1.98119E-05        | 1.512659364        | 0.597607143        |
| 2035      | Deoxyadenosine                                         | 0.9967        | MS2 forward        | 252.1103974        | 137.571        | 0.047359591        | 0.080148641        | 1.414449248        | 5.79021E-05        | 8.43451E-05        | 1.679012234        | 0.747612743        |
| 845       | Cyclohexamine                                          | 0.736         | MS2 forward        | 160.1340962        | 366.77         | 0.13458957         | 0.248882508        | 1.476320113        | 1.68106E-05        | 3.26009E-05        | 1.849483487        | 0.88712242         |
| 552       | Hypoxanthine                                           | 0.9851        | MS2 forward        | 137.0468347        | 161.13         | 0.856308413        | 0.305811013        | 1.573326599        | 2.98852E-08        | 2.5103E-07         | 0.357127185        | -1.485450135       |
| 1532      | N-Acetylsarotonin                                      | 0.9363        | MS2 forward        | 219.1138801        | 42.048         | 0.052150172        | 0.080338575        | 1.144200633        | 0.00698838         | 0.004055303        | 1.545232678        | 0.62342857         |
| 5053      | 1-Palmitoyl-2-hydroxy-sn-glycero-3-phosphoethanolamine | 0.9854        | MS2 forward        | 454.2934799        | 183.947        | 0.04384008         | 0.059804718        | 1.422475559        | 7.24642E-05        | 0.000101115        | 1.389566398        | 0.471932836        |
| 1543      | Parathionate                                           | 0.8664        | MS2 forward        | 220.1192291        | 253.75         | 0.010150136        | 0.007396832        | 1.325302862        | 0.00093021         | 0.000820568        | 0.728082122        | -0.461795365       |
| 669       | (3-Carboxypropyl)trimethylammonium cation              | 0.9407        | MS2 forward        | 146.1187644        | 358.746        | 0.247834251        | 0.473767062        | 1.502070857        | 1.26983E-05        | 2.89911E-05        | 1.911628683        | 0.93482232         |
| 229       | Picolinic acid                                         | 0.6392        | MS2 forward        | 106.0293815        | 61.8615        | 0.05222723         | 0.004689963        | 1.581571957        | 3.4240E-05         | 5.6471E-05         | 0.093315181        | -3.421744378       |
| 717       | Triethanolamine                                        | 0.9353        | MS2 forward        | 150.1131989        | 281.019        | 0.019621289        | 0.013134871        | 1.589134163        | 1.02155E-06        | 4.31364E-06        | 0.669419409        | -0.570917715       |
| 2211      | Creatine                                               | 0.9929        | MS2 reverse        | 263.1471411        | 329.269        | 0.00327034         | 0.008574147        | 1.401040407        | 4.71717E-05        | 7.10241E-05        | 2.621790668        | 1.390552501        |
| 1378      | Acetylcarbitol                                         | 0.9997        | MS2 forward        | 204.1244643        | 288.22         | 0.804654796        | 2.91169269         | 1.517057572        | 0.000190931        | 0.00021074         | 3.618561283        | 1.855416205        |
| 365       | Tyramine                                               | 0.6795        | MS2 forward        | 120.0813508        | 245.086        | 0.041628443        | 0.09250713         | 1.381416588        | 0.000343347        | 0.000350132        | 1.447340874        | 0.53408279         |
| 9876      | N-Docosanoyl-4-sphingyl-1-O-phosphorylcholine          | 0.9672        | MS2 forward        | 787.6679738        | 157.806        | 0.054259661        | 0.004626597        | 1.427348229        | 0.005067079        | 0.003210103        | 0.082627871        | -3.55185396        |
| 385       | Nicotinamide                                           | 0.9903        | MS2 forward        | 123.056316         | 61.942         | 21.57807896        | 2.535547177        | 1.639863365        | 1.64988E-05        | 3.22102E-05        | 0.11750382         | -3.082527276       |
| 5769      | <b>Adenosine 5' triphosphate (ATP)</b>                 | <b>0.9975</b> | <b>MS2 forward</b> | <b>508.0023413</b> | <b>490.582</b> | <b>0.853789825</b> | <b>0.838646732</b> | <b>1.288705943</b> | <b>0.002851534</b> | <b>0.002840259</b> | <b>0.718473302</b> | <b>-0.47681499</b> |
| 2302      | Adenosine                                              | 1             | MS2 forward        | 268.1062302        | 162.349        | 14.28456311        | 10.63037793        | 1.179482052        | 0.013617399        | 0.007149147        | -0.424242987       |                    |
| 537       | Adenine                                                | 0.9993        | MS2 forward        | 136.0634393        | 151.338        | 5.778614743        | 1.05121514         | 1.568461243        | 0.00015769         | 0.000183008        | 0.181878956        | -2.458955328       |
| 2315      | Inosine                                                | 0.9998        | MS2 forward        | 269.0892839        | 206.488        | 0.115777735        | 0.02862546         | 1.570286657        | 3.20036E-05        | 5.47955E-05        | 0.258188071        | -1.95300016        |
| 1944      | 2-Methylbutylcarbitol                                  | 0.9947        | MS2 forward        | 246.1721331        | 223.692        | 0.368477747        | 2.627169661        | 1.586641894        | 5.28797E-06        | 1.39551E-05        | 7.129759277        | 2.833860136        |
| 2412      | 1,2,3-Benzene-triol                                    | 0.8925        | MS2 reverse        | 275.0539118        | 384.625        | 0.007756626        | 0.002956457        | 1.528027054        | 0.000734162        | 0.000674848        | 0.382312798        | -1.38711746        |
| 1915      | Uridine                                                | 0.9913        | MS2 forward        | 245.077937         | 154.749        | 0.010133541        | 0.006137275        | 1.318885233        | 0.000752486        | 0.00068878         | 0.605639723        | -0.723468263       |
| 746       | 2-Hydroxyadenine                                       | 0.868         | MS2 forward        | 152.0574864        | 214.36         | 0.14460689         | 0.054253653        | 1.530458694        | 9.18774E-05        | 0.000121992        | 0.375178955        | -1.414360958       |
| 129       | L-Alanine                                              | 0.9959        | MS2 forward        | 90.05579365        | 329.328        | 0.147753573        | 0.237192951        | 1.446721546        | 1.78035E-05        | 3.3811E-05         | 1.60323022         | 0.652868118        |
| 4711      | Stearoylcarbitol                                       | 0.9978        | MS2 forward        | 428.3733889        | 152.81         | 0.236475622        | 1.404815078        | 1.584236938        | 4.0803E-11         | 9.63406E-10        | 4.30327002         | 2.10543571         |
| 4338      | L-Palmitoylcarbitol                                    | 0.9624        | MS2 forward        | 400.3440676        | 156.009        | 0.76783325         | 4.03343981         | 1.588242307        | 3.68793E-12        | 2.49803E-10        | 5.254731115        | 2.393616943        |
| 5706      | 1-Eicosatrenoyl-sn-glycero-3-phosphoethanolamine       | 0.954         | MS2 reverse        | 504.306641         | 179.46         | 0.033961813        | 0.039137701        | 1.305526992        | 0.001233583        | 0.001030065        | 1.152403183        | 0.204645551        |
| 2914      | Cytidine 2, 3'-cyclic phosphate                        | 0.9985        | MS2 forward        | 306.0496902        | 301.109        | 0.010396838        | 0.007483363        | 1.165704631        | 0.01287244         | 0.006882329        | 0.719772585        | -0.474386139       |
| 916       | L-Phenylalanine                                        | 0.9599        | MS2 forward        | 166.0668713        | 245.32         | 0.025514705        | 0.035401957        | 1.308894926        | 0.0107916          | 0.000927996        | 1.387511883        | 0.472500127        |

(6) Supplementary Table 3

| PC3-ID      | MS2 name                                               | MS2 score     | type               | mz                 | rt             | MEAN NC            | MEAN SH            | VIP                | P-VALUE            | Q-VALUE           | FOLD CHANGE        | LOG_FOLDCHANGE     |
|-------------|--------------------------------------------------------|---------------|--------------------|--------------------|----------------|--------------------|--------------------|--------------------|--------------------|-------------------|--------------------|--------------------|
| 5494        | 1-Myristoyl-sn-glycero-3-phosphocholine                | 0.9325        | MS2 forward        | 468.308391         | 181.812        | 0.051046966        | 0.066798835        | 1.522114272        | 0.000397188        | 0.001443145       | 0.764189763        | -0.387997163       |
| 299         | Creatinine                                             | 0.9987        | MS2 forward        | 114.0648888        | 160.394        | 0.056676825        | 0.056915466        | 1.205107778        | 0.01329476         | 0.021898852       | 0.768815395        | -0.37929087        |
| 531         | Methyl acetacetate                                     | 0.9956        | MS2 reverse        | 134.0794154        | 49.599         | 0.017904285        | 0.028126949        | 1.094131948        | 0.028619252        | 0.036683579       | 0.685280336        | -0.545233804       |
| 895         | L-Carnitine                                            | 0.9813        | MS2 forward        | 162.1114882        | 336.82         | 0.378115916        | 0.622869035        | 1.521112892        | 0.000143403        | 0.000896687       | 0.602879295        | -0.730059911       |
| 1959        | Lys-Val                                                | 0.9925        | MS2 reverse        | 246.1901166        | 528.129        | 0.030403031        | 0.037540245        | 1.063641598        | 0.036574589        | 0.045330083       | 0.908978316        | -0.304222935       |
| 320         | L-Proline                                              | 0.9999        | MS2 forward        | 116.0298894        | 294.923        | 0.260733768        | 0.458145487        | 1.594047938        | 7.71951E-05        | 0.00046021        | 0.571602234        | -0.908916539       |
| 6145        | 1-O-Octadecyl-sn-glycero-3-phosphocholine              | 0.8576        | MS2 forward        | 510.390612         | 178.4305       | 0.048494489        | 0.015407819        | 1.496443835        | 0.001985556        | 0.00484653        | 3.147394739        | 1.654158129        |
| 437         | Taurine                                                | 0.9972        | MS2 forward        | 128.0202209        | 278.174        | 0.055192521        | 0.076162896        | 1.32047943         | 0.003554675        | 0.007403007       | 0.724030089        | -0.46580488        |
| 288         | Uracil                                                 | 0.9624        | MS2 forward        | 113.0332083        | 155.063        | 0.180321127        | 0.274338426        | 1.439412016        | 0.002177922        | 0.000673411       | 0.65729446         | -0.60538627        |
| 3064        | Tyr-Met                                                | 0.9712        | MS2 forward        | 312.1100801        | 162.295        | 0.061431098        | 0.080911317        | 1.369783457        | 0.02846882         | 0.006000068       | 0.792029871        | -0.397372338       |
| 9687        | 1-Stearoyl-2-hydroxy-sn-glycero-3-phosphoethanolamine  | 0.6575        | MS2 forward        | 482.3257604        | 179.05         | 0.034055956        | 0.105035231        | 1.736079849        | 1.99857E-08        | 1.79263E-06       | 0.324233647        | -1.624894284       |
| 2050        | Deoxyadenosine                                         | 0.9995        | MS2 forward        | 252.1082142        | 137.501        | 0.062826506        | 0.211394428        | 1.594028763        | 1.82117E-07        | 5.2892E-06        | 0.287200641        | -1.750490866       |
| 879         | Cyclohexylamine                                        | 0.7289        | MS2 forward        | 160.131509         | 366.971        | 0.026902875        | 0.032241402        | 1.052495842        | 0.041941759        | 0.050180614       | 0.834413922        | -0.261164866       |
| 568         | Hypoxanthine                                           | 0.9909        | MS2 forward        | 137.0446234        | 160.392        | 0.342590181        | 1.156474829        | 1.737664854        | 1.91795E-08        | 1.7589E-06        | 0.296236609        | -1.755178157       |
| 1573        | N-Acetylsarcosine                                      | 0.9481        | MS2 forward        | 219.1118279        | 40.851         | 0.053406017        | 0.080104907        | 1.442729285        | 0.001770455        | 0.004477754       | 0.686710394        | -0.584888333       |
| 5287        | 1-Palmitoyl-2-hydroxy-sn-glycero-3-phosphoethanolamine | 0.9926        | MS2 forward        | 454.2925385        | 183.823        | 0.041901617        | 0.053356606        | 1.570140097        | 0.000240187        | 0.000922276       | 0.785312653        | -0.348900563       |
| 1988        | Pantoic acid                                           | 0.9434        | MS2 forward        | 220.1168798        | 254.138        | 0.034304455        | 0.055018902        | 1.456015161        | 0.000642474        | 0.002837463       | 0.623507623        | -0.601020995       |
| 690         | (3-Carboxypropyl)trimethylammonium cation              | 0.8707        | MS2 forward        | 146.1162108        | 359.911        | 0.045306047        | 0.052914246        | 1.089117653        | 0.02826988         | 0.038232243       | 0.857637616        | -0.221223515       |
| 410         | Picolinic acid                                         | 0.9972        | MS2 reverse        | 124.0376372        | 201.562        | 0.002220327        | 0.00498091         | 1.607195178        | 5.90548E-05        | 0.000371975       | 0.6671815          | -1.13054464        |
| 765         | Triethanolamine                                        | 0.8838        | MS2 forward        | 150.1108306        | 283.742        | 0.00369664         | 0.019071315        | 1.004523146        | 0.042112434        | 0.003333342       | 0.803739618        | -0.267531911       |
| 2875        | Creatine                                               | 0.9948        | MS2 reverse        | 301.1019067        | 329.773        | 0.002748839        | 0.003831197        | 1.152142837        | 0.03110452         | 0.040798099       | 0.716769286        | -0.480419277       |
| 1407        | Acetylcarlamine                                        | 0.9987        | MS2 forward        | 204.1226211        | 289.263        | 2.801273519        | 3.492838604        | 1.231099978        | 0.02641813         | 0.036494909       | 0.74474541         | -0.425180768       |
| 369         | Tyramine                                               | 0.9125        | MS2 forward        | 120.0794312        | 239.513        | 0.046279365        | 0.080574026        | 1.65401774         | 1.11222E-05        | 0.00107925        | 0.574370758        | -0.799945792       |
| 11867       | N-Docosanoyl-4-sphingeryl-1-O-phosphorylcholine        | 0.9979        | MS2 reverse        | 801.5572369        | 113.377        | 0.016229189        | 0.021990181        | 1.367313807        | 0.001557422        | 0.004052789       | 0.7380198          | -0.438268572       |
| 395         | Nicotinamide                                           | 0.999         | MS2 forward        | 123.0540603        | 145.178        | 0.266795219        | 0.473401217        | 1.533981268        | 0.000537019        | 0.001821401       | 0.563486663        | -0.82754151        |
| <b>6099</b> | <b>Adenosine 5'-triphosphate (ATP)</b>                 | <b>0.9942</b> | <b>MS2 forward</b> | <b>508.0028273</b> | <b>459.231</b> | <b>0.093786737</b> | <b>0.046590666</b> | <b>1.543146052</b> | <b>0.000515779</b> | <b>0.00176722</b> | <b>2.012991433</b> | <b>1.009342968</b> |
| 7276        | Adenosine                                              | 1             | MS2 reverse        | 573.1449532        | 347.978        | 0.004798004        | 0.008632445        | 1.602802496        | 1.13819E-05        | 0.000109495       | 0.585879974        | -0.847154687       |
| 549         | Adenosine                                              | 0.9997        | MS2 forward        | 136.0614794        | 151.182        | 3.544003932        | 8.871405509        | 1.711573093        | 6.4089E-08         | 3.39097E-06       | 0.399486184        | -1.323762486       |
| 2356        | Inosine                                                | 0.9999        | MS2 forward        | 289.0874033        | 205.927        | 0.048893303        | 0.196437822        | 1.728958139        | 1.07533E-07        | 4.37208E-06       | 0.2493578          | -2.003710763       |
| 1958        | 2-Methylbutyryl carnitine                              | 0.9925        | MS2 forward        | 246.1688287        | 224.866        | 0.03067749         | 0.040307622        | 1.171686713        | 0.014580001        | 0.023483722       | 0.78600226         | -0.384079742       |
| 2449        | 1,2,3-Benzoxazole                                      | 0.9905        | MS2 reverse        | 275.051415         | 382.98         | 0.00344821         | 0.020381946        | 1.597811484        | 0.003104107        | 0.00676787        | 1.6554992          | 0.727290383        |
| 1933        | Uridine                                                | 0.9972        | MS2 forward        | 245.0757948        | 155.045        | 0.029190351        | 0.044552807        | 1.530019421        | 0.00122889         | 0.000591149       | 0.655188407        | -0.810018385       |
| 1029        | 2-Hydroxyadenine                                       | 0.9673        | MS2 forward        | 174.0388337        | 247.3885       | 0.002073985        | 0.003033285        | 1.697230991        | 0.00388882         | 0.001413152       | 0.414538759        | -1.270462959       |
| 118         | L-Alanine                                              | 0.996         | MS2 forward        | 90.05411398        | 329.763        | 0.229790623        | 0.253952673        | 1.125169509        | 0.035611011        | 0.044475424       | 0.906263577        | -0.141965593       |
| 4887        | Stearoyl carnitine                                     | 0.995         | MS2 forward        | 428.3731202        | 153.07         | 0.35872784         | 0.240405033        | 1.628751136        | 8.41251E-06        | 8.98291E-05       | 1.482157125        | 0.57739846         |
| 4444        | L-Palmitoyl carnitine                                  | 0.993         | MS2 forward        | 400.3428183        | 156.421        | 2.207890216        | 0.703972216        | 1.745655367        | 3.24124E-10        | 8.57477E-08       | 3.1360412          | 1.64894455         |
| 6042        | 1-Eicosatienyl-sn-glycero-3-phosphoethanolamine        | 0.9738        | MS2 reverse        | 504.3066806        | 179.833        | 0.02765256         | 0.035258665        | 1.56373289         | 0.000160878        | 0.000717606       | 0.781724322        | -0.35628917        |
| 2568        | Cytidine 2',3'-cyclic phosphate                        | 0.9992        | MS2 forward        | 306.0492931        | 396.48         | 0.003361139        | 0.005048633        | 1.316962706        | 0.011994412        | 0.002009069       | 0.665752314        | -0.586942558       |
| 939         | L-Phenylalanine                                        | 0.9964        | MS2 forward        | 166.0848735        | 239.617        | 0.027594047        | 0.040976299        | 1.620009336        | 4.83898E-05        | 0.000329564       | 0.665831394        | -0.587789935       |
